# Supplementary material for: Genome-Wide Identification of Chicken Bursae of Fabricius miRNAs in Response To Very Virulent Infectious Bursal Disease Virus
Source: Research Square preprint supplement (doi:10.21203/rs.3.rs-1051741/v1), 2021-11-16
Supplement: Supplementary file 1 [file 0e74dd78fb566f0f622009b8.xlsx]

## Sheet: Sheet1
miRNA	GeneID	Symbol
gga-miR-7465-3p	NM_001318458.1	TRIM25
gga-miR-122-3p	XM_025144666.1	IL6ST
gga-miR-122-5p	XM_418301.5	LY96
gga-miR-1666	XM_015291508.2	GNB4
gga-miR-1683	NM_001030931.2	STAT3
gga-miR-1683	NM_001031345.1	CTSS
gga-miR-1684a-3p	NM_001199453.1	THBS1
gga-miR-1684a-3p	NM_205415.1	IRF1
gga-miR-1684b-3p	NM_001030962.3	MYD88
gga-miR-1684b-3p	NM_001199453.1	THBS1
gga-miR-1684b-3p	NM_205415.1	IRF1
gga-miR-1684b-3p	XM_001235162.5	P2RX7
gga-miR-1684b-3p	XM_025144666.1	IL6ST
gga-miR-1763b-3p	XM_025144666.1	IL6ST
gga-miR-1788-3p	NM_001007822.1	BIRC2
gga-miR-1788-3p	NM_001030931.2	STAT3
gga-miR-1788-3p	XM_015276499.2	PTPN13
gga-miR-1788-3p	XM_015289449.2	STAT4
gga-miR-1788-3p	XM_015297946.2	IL18
gga-miR-1788-3p	XM_025142267.1	CSNK2A1
gga-miR-1788-3p	XM_025143170.1	IL18
gga-miR-1788-3p	XM_025144666.1	IL6ST
gga-miR-1808	XM_015282087.2	MAP3K8
gga-miR-194	NM_001001858.2	STMN1
gga-miR-194	XM_015283721.2	LTBP1
gga-miR-194	XM_015283723.2	LTBP1
gga-miR-194	XM_015293509.2	CD86
gga-miR-2130	NM_001030721.1	RPS6KB1
gga-miR-2130	NM_001302168.1	CCL19
gga-miR-2130	NM_205372.1	IRF7
gga-miR-2130	XM_025149124.1	PTK2B
gga-miR-215-5p	XM_015289392.2	STAT1
gga-miR-215-5p	XM_015297946.2	IL18
gga-miR-215-5p	XM_025143170.1	IL18
gga-miR-215-5p	XM_025152161.1	STAT1
gga-miR-3530-5p	NM_001012914.1	STAT1
gga-miR-3530-5p	NM_001030931.2	STAT3
gga-miR-3530-5p	NM_001199453.1	THBS1
gga-miR-3530-5p	XM_015289392.2	STAT1
gga-miR-3530-5p	XM_015293509.2	CD86
gga-miR-3530-5p	XM_025152161.1	STAT1
gga-miR-3536	XM_025144666.1	IL6ST
gga-miR-425-5p	XM_417710.4	GBP1
gga-miR-6549-3p	XM_015276499.2	PTPN13
gga-miR-6549-3p	XM_015288350.2	CXCL12
gga-miR-6549-3p	XM_015297946.2	IL18
gga-miR-6549-3p	XM_025143170.1	IL18
gga-miR-6604-5p	XM_004948616.3	DHX58
miR-146-x	NM_001012914.1	STAT1
miR-146-x	XM_001235162.5	P2RX7
miR-146-x	XM_015289392.2	STAT1
miR-146-x	XM_015297946.2	IL18
miR-146-x	XM_025143170.1	IL18
miR-146-x	XM_025152161.1	STAT1
miR-152-y	NM_001302168.1	CCL19
miR-152-y	NM_205415.1	IRF1
miR-152-y	XM_004948616.3	DHX58
miR-152-y	XM_015281503.2	CCR2
miR-152-y	XM_015283721.2	LTBP1
miR-152-y	XM_015283723.2	LTBP1
miR-152-y	XM_025149124.1	PTK2B
miR-191-x	NM_205415.1	IRF1
miR-191-x	XM_015297946.2	IL18
miR-191-x	XM_025143170.1	IL18
miR-191-x	XM_025144666.1	IL6ST
miR-21-x	NM_205372.1	IRF7
miR-21-x	XM_001234608.5	CRCBL
miR-21-x	XM_004937774.3	CRCBL
miR-21-x	XM_015282087.2	MAP3K8
miR-222-y	XM_418301.5	LY96
miR-223-y	NM_001030721.1	RPS6KB1
miR-223-y	XM_417710.4	GBP1
miR-425-x	NM_001012914.1	STAT1
miR-425-x	XM_015281503.2	CCR2
miR-425-x	XM_015289392.2	STAT1
miR-425-x	XM_025152161.1	STAT1
miR-425-x	XM_417710.4	GBP1
miR-462-x	XM_015289449.2	STAT4
miR-462-x	XM_015297946.2	IL18
miR-462-x	XM_025143170.1	IL18
miR-7-x	NM_001007822.1	BIRC2
miR-7-x	XM_015283624.2	HSP90AB1
miR-7-x	XM_015288350.2	CXCL12
miR-7-x	XM_015289449.2	STAT4
miR-122-x	XM_418301.5	LY96
miR-1246-x	XM_015297946.2	IL18
miR-1246-x	XM_025143170.1	IL18
miR-215-x	XM_015297946.2	IL18
miR-215-x	XM_025143170.1	IL18
miR-221-y	XM_418301.5	LY96
miR-29-x	NM_001199447.2	ANGPT1
miR-29-x	XM_015289449.2	STAT4
miR-29-x	XM_025144666.1	IL6ST
miR-2995-x	NM_205415.1	IRF1
miR-2995-x	XM_015288350.2	CXCL12
miR-2995-x	XM_015297946.2	IL18
miR-2995-x	XM_025143170.1	IL18
miR-10573-z	NM_205415.1	IRF1
miR-10575-y	NM_001318458.1	TRIM25
miR-10575-y	XM_015288350.2	CXCL12
miR-12268-x	XM_015289392.2	STAT1
miR-191-y	NM_001007822.1	BIRC2
miR-191-y	NM_205415.1	IRF1
miR-2779-y	NM_001030931.2	STAT3
miR-2779-y	XM_003642981.4	LOC100857191
miR-2779-y	XM_004948616.3	DHX58
miR-28-y	XM_015288350.2	CXCL12
miR-3620-x	NM_205372.1	IRF7
miR-3620-x	XM_004948616.3	DHX58
miR-1587-x	NM_001007822.1	BIRC2
miR-1587-x	NM_001012914.1	STAT1
miR-1587-x	NM_001044689.1	CASP18
miR-1587-x	XM_015289392.2	STAT1
miR-1587-x	XM_025144666.1	IL6ST
miR-1587-x	XM_025152161.1	STAT1
miR-1587-x	XM_025153348.1	PIK3CB
miR-1684-y	XM_001234608.5	CRCBL
miR-1684-y	XM_004937774.3	CRCBL
miR-1684-y	XM_015276499.2	PTPN13
miR-2991-y	XM_015281503.2	CCR2
miR-500-y	XM_001234608.5	CRCBL
miR-500-y	XM_003642981.4	LOC100857191
miR-500-y	XM_004937774.3	CRCBL
miR-500-y	XM_015288212.2	CSF2RB
miR-500-y	XM_015288215.2	CSF2RB
miR-502-y	XM_001234608.5	CRCBL
miR-502-y	XM_003642981.4	LOC100857191
miR-502-y	XM_004937774.3	CRCBL
miR-502-y	XM_015288212.2	CSF2RB
miR-502-y	XM_015288215.2	CSF2RB
miR-1261-x	XM_418301.5	LY96
miR-378-x	XM_015291508.2	GNB4
miR-378-x	XM_025144666.1	IL6ST
miR-4507-y	NM_205372.1	IRF7
miR-451-y	XM_015291508.2	GNB4
miR-451-y	XM_417710.4	GBP1
miR-737-x	NM_001030721.1	RPS6KB1
miR-737-x	NM_001199447.2	ANGPT1
miR-737-x	NM_001199453.1	THBS1
novel-m0087-5p	NM_001193638.1	IFIH1
novel-m0087-5p	NM_001199453.1	THBS1
novel-m0087-5p	XM_004948616.3	DHX58
novel-m0087-5p	XM_025149124.1	PTK2B
novel-m0094-5p	NM_001007822.1	BIRC2
novel-m0094-5p	NM_001348656.1	CXCL13L2
novel-m0094-5p	XM_015289392.2	STAT1
novel-m0094-5p	XM_025152161.1	STAT1
novel-m0174-3p	XM_015275716.2	NAMPT
novel-m0174-3p	XM_025144666.1	IL6ST
novel-m0174-3p	XM_418301.5	LY96
novel-m0075-5p	XM_015293509.2	CD86
novel-m0105-3p	XM_001235162.5	P2RX7
novel-m0105-3p	XM_015275716.2	NAMPT
novel-m0105-3p	XM_015283721.2	LTBP1
novel-m0105-3p	XM_015283723.2	LTBP1
novel-m0105-3p	XM_015288350.2	CXCL12
novel-m0105-3p	XM_015291508.2	GNB4
novel-m0176-3p	NM_001030931.2	STAT3
novel-m0176-3p	XM_015291508.2	GNB4
novel-m0176-3p	XM_416167.6	APAF1
novel-m0237-3p	XM_003642981.4	LOC100857191
novel-m0237-3p	XM_004948616.3	DHX58
novel-m0237-3p	XM_015288350.2	CXCL12
novel-m0210-3p	XM_001235162.5	P2RX7
novel-m0210-3p	XM_003642981.4	LOC100857191
novel-m0112-5p	NM_001030931.2	STAT3
novel-m0112-5p	NM_205372.1	IRF7
novel-m0070-5p	XM_004948616.3	DHX58
novel-m0088-5p	NM_205415.1	IRF1
novel-m0088-5p	XM_015288350.2	CXCL12
novel-m0088-5p	XM_015297946.2	IL18
novel-m0088-5p	XM_025143170.1	IL18
novel-m0132-3p	NM_001007822.1	BIRC2
novel-m0132-3p	NM_205415.1	IRF1
novel-m0167-5p	XM_015289392.2	STAT1
novel-m0167-5p	XM_025152161.1	STAT1
novel-m0065-3p	XM_003642981.4	LOC100857191
novel-m0065-3p	XM_015282087.2	MAP3K8
novel-m0065-3p	XM_015288212.2	CSF2RB
novel-m0065-3p	XM_015288215.2	CSF2RB
novel-m0065-3p	XM_015288350.2	CXCL12
novel-m0085-3p	XM_004948616.3	DHX58
novel-m0054-3p	NM_205415.1	IRF1
novel-m0054-3p	XM_003642981.4	LOC100857191
novel-m0054-3p	XM_015288350.2	CXCL12
novel-m0054-3p	XM_015297946.2	IL18
novel-m0054-3p	XM_025143170.1	IL18
novel-m0219-5p	XM_015275716.2	NAMPT
novel-m0219-5p	XM_025144666.1	IL6ST
