# Supplementary material for: Genome-Wide Identification of Chicken Bursae of Fabricius miRNAs in Response To Very Virulent Infectious Bursal Disease Virus
Source: Research Square preprint supplement (doi:10.21203/rs.3.rs-1051741/v1), 2021-11-16
Supplement: Supplementary file 2 [file b9e762afae1e93aa75c184ea.xlsx]

## Sheet: Sheet1
sample	total	Exon_sense	Exon_antisense	Intron_sense	Intron_antisense
all	78473134 (100.00%)	13979652 (17.81%)	2906083 (3.70%)	28699120 (36.57%)	10850806 (13.83%)
CK-1	11833188 (100.00%)	2501523 (21.14%)	463160 (3.91%)	4085674 (34.53%)	1369627 (11.57%)
CK-2	18250204 (100.00%)	2878376 (15.77%)	751841 (4.12%)	6899590 (37.81%)	2666950 (14.61%)
CK-3	12270788 (100.00%)	1852991 (15.10%)	478050 (3.90%)	4566564 (37.21%)	1939593 (15.81%)
LJ-1	11525507 (100.00%)	2091484 (18.15%)	378644 (3.29%)	4229176 (36.69%)	1472913 (12.78%)
LJ-2	13223657 (100.00%)	2477507 (18.74%)	467338 (3.53%)	4858787 (36.74%)	1786958 (13.51%)
LJ-3	11369790 (100.00%)	2177771 (19.15%)	367050 (3.23%)	4059329 (35.70%)	1614765 (14.20%)
